# Supplementary material
Source: PubMed Central journal article supplement (PMC7348551)
Supplement: JB.00089-20-s0001.pdf [file JB.00089-20-s0001.pdf]

TABLE S1 Probability of receiver domain K+1 amino acid given K+2 amino acid

| Amino<br>at K+2 | Abundance<br>at K+2 (%) | % of Wild Type Receiver Domains with Indicated<br>Amino Acid at K+2 that have Pro, Asp, or Ser at K+1 |     |     |
|-----------------|-------------------------|-------------------------------------------------------------------------------------------------------|-----|-----|
|                 |                         | Pro                                                                                                   | Asp | Ser |
| Any             | 100                     | 82                                                                                                    | 5.3 | 2.9 |
| Phe             | 39                      | 99                                                                                                    | 0.1 | 0.2 |
| Val             | 15                      | 91                                                                                                    | 4.2 | 1.1 |
| Ile             | 13                      | 92                                                                                                    | 3.1 | 0.6 |
| Leu             | 5.8                     | 92                                                                                                    | 1.1 | 2.7 |
| Tyr             | 4.7                     | 99                                                                                                    | 0.1 | 0.2 |
| Trp             | 1.7                     | 98                                                                                                    | 0.4 | 0.4 |
| Ala             | 4.9                     | 33                                                                                                    | 26  | 12  |
| Ser             | 3.1                     | 24                                                                                                    | 17  | 16  |
| Thr             | 2.5                     | 23                                                                                                    | 37  | 7   |

Total sample size was 33,252 sequences (1).

TABLE S2 Comparison of *E. coli* CheY autophosphorylation rate constants determined by  $k_{\text{obs}}$  or  $K_{1/2}$  methods

| Amino acid at |     |     |     |     | $k_{\text{phos}}/K_{\text{S PAM}}$ | n | $k_{\text{dephos}}/K_{1/2 \text{ PAM}}$ |
|---------------|-----|-----|-----|-----|------------------------------------|---|-----------------------------------------|
| D+2           | T+1 | T+2 | K+1 | K+2 | ( $\text{M}^{-1} \text{s}^{-1}$ )  |   | ( $\text{M}^{-1} \text{s}^{-1}$ )       |
| Asn           | Ala | Glu | Pro | Phe | $8.1 \pm 1$                        | 3 | $8.8 \pm 1^{\text{a}}$                  |
| Asn           | Ala | Glu | Pro | Val | $160 \pm 6$                        | 3 | $170 \pm 20^{\text{a}}$                 |
| Asn           | Ala | Glu | Pro | Ile | $150 \pm 0$                        | 2 | $190 \pm 30^{\text{a}}$                 |
| Asn           | Thr | Ser | Pro | Phe | $3.5 \pm 0.7^{\text{b}}$           |   | $3.1 \pm 0.9^{\text{c}}$                |

<sup>a</sup>Value from Table 1.

<sup>b</sup>Value from (2)

<sup>c</sup>Value from Table 3.

TABLE S3 Binding affinity for  $\text{BeF}_3^-$  of *E. coli* CheY mutants altered at K+2

| Amino acid at |     | $k_{\text{dephos}}^a$ | $k_{\text{dephos}}/K_{1/2 \text{ PAM}}^a$ | $K_d \text{ BeF}_3^-$ | n |
|---------------|-----|-----------------------|-------------------------------------------|-----------------------|---|
| K+1           | K+2 | ( $\text{min}^{-1}$ ) | ( $\text{M}^{-1} \text{s}^{-1}$ )         | ( $\mu\text{M}$ )     |   |
| Pro           | Phe | $3.5 \pm 0.3$         | $9.0 \pm 1$                               | $23 \pm 6$            | 4 |
| Pro           | Tyr | $9.1 \pm 0.3$         | $27 \pm 2$                                | $18 \pm 10$           | 3 |
| Pro           | Ser | $5.8 \pm 0.3$         | $44 \pm 3$                                | $8.7 \pm 1$           | 3 |
| Pro           | Val | $7.6 \pm 0.3$         | $170 \pm 20$                              | $3.6 \pm 0.7$         | 3 |
| Pro           | Ala | $8.7 \pm 1$           | $730 \pm 90$                              | $0.70 \pm 0.07$       | 3 |

<sup>a</sup>Values from Table 2.

TABLE S4 Combined effects of substitutions at K+1 and K+2 on *E. coli* CheY autophosphorylation and autodephosphorylation rate constants<sup>a</sup>

| <u>Amino acid at</u><br>K+1                   | <u>Amino acid at</u><br>K+2 | Expected<br>Value <sup>b</sup> | Actual<br>Value <sup>c</sup> | Difference <sup>d</sup> |
|-----------------------------------------------|-----------------------------|--------------------------------|------------------------------|-------------------------|
| <i>k<sub>dephos</sub>/K<sub>1/2</sub> PAM</i> |                             |                                |                              |                         |
| Asp                                           | Ala                         | 3.5                            | 1.4                          | -2.1                    |
| Asp                                           | Thr                         | 1.6                            | 1.3                          | -0.25                   |
| Asp                                           | Val                         | 2.1                            | 1.1                          | -1.0                    |
| Ser                                           | Ala                         | 4.8                            | 1.5                          | -3.3                    |
| <i>k<sub>dephos</sub></i>                     |                             |                                |                              |                         |
| Asp                                           | Ala                         | 1.0                            | 0.49                         | -0.53                   |
| Asp                                           | Thr                         | 0.68                           | 0.51                         | -0.17                   |
| Asp                                           | Val                         | 0.89                           | 0.92                         | 0.03                    |
| Ser                                           | Ala                         | 1.2                            | 0.80                         | -0.38                   |

<sup>a</sup>Rate constants from Table 3.

<sup>b</sup>Expected value =  $\ln(\text{rate constant for K+1 mutant/wild-type rate constant}) + \ln(\text{rate constant for K+2 mutant/wild-type rate constant})$ , in units of -RT.

<sup>c</sup>Actual value =  $\ln(\text{rate constant for K+1/K+2 mutant/wild-type rate constant})$ , in units of -RT.

<sup>d</sup>Difference = Actual value - Expected value, in units of -RT. A difference with an absolute value of less than  $\ln 2 = 0.69$  suggests no significant interaction (less than a factor of 2) between the kinetic effects of substitutions at K+1 and K+2, i.e. the effects are additive. A difference  $< -\ln 2$  indicates antagonism and a difference  $> \ln 2$  indicates synergy.

TABLE S5 Combined effects of substitutions at D+2/T+1/T+2 and K+2 on *E. coli* CheY autophosphorylation and autodephosphorylation rate constants<sup>a</sup>

| Amino acid at                                 |     |     | Amino acid at | Expected           | Actual             | Difference <sup>d</sup> |
|-----------------------------------------------|-----|-----|---------------|--------------------|--------------------|-------------------------|
| D+2                                           | T+1 | T+2 | K+2           | Value <sup>b</sup> | Value <sup>c</sup> |                         |
| <i>k<sub>dephos</sub>/K<sub>1/2</sub> PAM</i> |     |     |               |                    |                    |                         |
| Glu                                           | Ser | Val | Ser           | 2.6                | 2.7                | 0.061                   |
| Glu                                           | Ser | Leu | Gln           | 4.0                | 4.0                | -0.029                  |
| Gln                                           | Ala | Asn | Val           | 4.3                | 4.0                | -0.37                   |
| Asn                                           | Thr | Ser | Val           | 1.9                | 1.1                | -0.77                   |
| Glu                                           | Ser | Arg | Tyr           | 4.1                | 3.4                | -0.70                   |
| <i>k<sub>dephos</sub></i>                     |     |     |               |                    |                    |                         |
| Glu                                           | Ser | Val | Ser           | 1.8                | 1.3                | -0.51                   |
| Glu                                           | Ser | Leu | Gln           | 2.0                | 1.8                | -0.23                   |
| Gln                                           | Ala | Asn | Val           | 0.22               | -0.090             | -0.31                   |
| Asn                                           | Thr | Ser | Val           | 0.72               | -0.090             | -0.81                   |
| Glu                                           | Ser | Arg | Tyr           | 1.5                | 1.0                | -0.52                   |

<sup>a</sup>Rate constants from Table 3.

<sup>b</sup>Expected value =  $\ln(\text{rate constant for D+2/T+1/T+2 mutant/wild-type rate constant}) + \ln(\text{rate constant for K+2 mutant/wild-type rate constant})$ , in units of  $-RT$ .

<sup>c</sup>Actual value =  $\ln(\text{rate constant for D+2/T+1/T+2/K+2 mutant/wild-type rate constant})$ , in units of  $-RT$ .

<sup>d</sup>Difference = Actual value - Expected value, in units of  $-RT$ . A difference with an absolute value of less than  $\ln 2 = 0.69$  suggests no significant interaction (less than a factor of 2) between the kinetic effects of substitutions at D+2/T+1/T+2 and K+2, i.e. the effects are additive. A difference  $< -\ln 2$  indicates antagonism and a difference  $> \ln 2$  indicates synergy.

TABLE S6 Frequency of amino acids at K+1 and K+2 by response regulator family<sup>a</sup>

| Amino acids at<br>K+1 K+2 |                          | Frequency of indicated amino acid in wild-type receiver domains (%) <sup>b</sup> |               |               |      |      |                  |                   |       |
|---------------------------|--------------------------|----------------------------------------------------------------------------------|---------------|---------------|------|------|------------------|-------------------|-------|
|                           |                          | All<br>receivers                                                                 | OmpR/<br>PhoB | FixJ/<br>NarL | NtrC | LytR | Single<br>domain | Hybrid<br>kinases | Other |
| Pro                       | Phe                      | 40                                                                               | 84            | 7.8           | 48   | 21   | 38               | 27                | 26    |
| Pro                       | Ile/Leu/Val <sup>c</sup> | 29                                                                               | 7.2           | 5.3           | 32   | 68   | 36               | 49                | 34    |
| Pro                       | Trp/Tyr                  | 6.2                                                                              | 4.9           | 0.5           | 11   | 6.1  | 5.8              | 9.1               | 6.9   |
| Pro                       | Ala                      | 1.6                                                                              | 0.6           | 0.2           | 1.3  | 0.9  | 2.5              | 1.6               | 3.2   |
| Pro                       | Cys/Gly/Ser/Thr          | 2.6                                                                              | 1.6           | 0.3           | 3.1  | 0.4  | 4.1              | 1.2               | 6.7   |
| Pro                       | Asn/Gln/Met              | 0.7                                                                              | 0.0           | 0.0           | 0.2  | 0.1  | 1.5              | 0.7               | 1.1   |
| Pro                       | Arg/Asp/Glu/His/Lys      | 0.9                                                                              | 0.0           | 0.0           | 0.1  | 0.0  | 0.8              | 0.1               | 4.7   |
| Pro                       | Pro                      | 0.5                                                                              | 0.1           | 0.1           | 0.7  | 0.2  | 1.0              | 0.2               | 1.3   |
| Pro                       | Any                      | 82                                                                               | 99            | 14            | 96   | 96   | 90               | 89                | 84    |
| Asp                       | Any                      | 5.3                                                                              | 0.3           | 35            | 0.3  | 0.9  | 1.5              | 1.4               | 2.2   |
| Ser                       | Any                      | 2.9                                                                              | 0.3           | 11            | 0.4  | 0.6  | 3.3              | 2.1               | 1.8   |
| Gly                       | Any                      | 2.4                                                                              | 0.2           | 5.8           | 1.8  | 0.3  | 1.3              | 3.8               | 2.7   |

<sup>a</sup>Response regulator families from (1). Sample sizes were: All receivers, 33,252; OmpR/PhoB, 6,697; FixJ/NarL, 4,081; NtrC, 1,920; LytR, 1,383; Single domain, 5,905; Hybrid kinase, 8,113; Other, 5,345.

<sup>b</sup>Values <1% rounded to nearest 0.1%.

<sup>c</sup>The groupings of K+2 amino acids follow the clusters of rate constants indicated in Figure 2. We have no kinetic data for the effects of Cys, His, or Pro at K+2. Based on the clustering of K+2 amino acid abundance by side chain chemical properties, here Cys is grouped with Ser/Thr and His is grouped with charged amino acids.

## REFERENCES

1. Page SC, Immormino RM, Miller TH, Bourret RB. 2016. Experimental analysis of functional variation within protein families: Receiver domain autodephosphorylation kinetics. *J Bacteriol* 198:2483-2493. <https://doi.org/10.1128/JB.00853-15>
2. Immormino RM, Silversmith RE, Bourret RB. 2016. A variable active site residue influences the kinetics of response regulator phosphorylation and dephosphorylation. *Biochemistry* 55:5595-5609. <https://doi.org/10.1021/acs.biochem.6b00645>
